# Supplementary material for: Arylselanyl motifs in hierarchically structured mesoporous phenolic polymers: efficient adsorption sites for Hg2+ ions
Source: Royal Society of Chemistry journal article supplement (doi:10.1039/d4ma00899e), 2024-01-01
Supplement: d4ma00899e1.pdf [file d4ma00899e1.pdf]

**Arylselanyl-motifs in hierarchically-structured mesoporous phenolic  
polymers: Efficient adsorption sites for the Hg<sup>2+</sup> ions**

Vishnu Selladurai and Selvakumar Karuthapandi\*

Department of Chemistry, School of Advanced Sciences, VIT-AP University, India

Corresponding author email-id. selvakumar.k@vitap.ac.in

**Electronic Supplementary Information (ESI)**

**Table of Contents**

| <b>S. No</b> | <b>Content</b>                                                                                                      | <b>Page No</b> |
|--------------|---------------------------------------------------------------------------------------------------------------------|----------------|
| 1.           | Synthesis of Rh-B-imine                                                                                             | S2             |
| 2.           | Mechanism of selenation and polymerization                                                                          | S3-S5          |
| 3.           | Spectrometric characterization of Rh-B-imine                                                                        | S6-S8          |
| 4.           | Elemental mapping and EDAX analysis of Se-PR 1 and Se-PR 2                                                          | S9-S10         |
| 5.           | Freundlich adsorption isotherm (linear fit model) for the Hg <sup>2+</sup> adsorption on Se-PR 1 and Se-PR 2        | S11            |
| 6.           | Comparison FT-IR spectrum pristine and Hg <sup>2+</sup> treated polymers                                            | S12-13         |
| 7.           | Comparison of FE-SEM images of pristine Se-PR 1 and Se-PR 2 with their respective Hg <sup>2+</sup> treated material | S14            |
| 8.           | Elemental mapping and EDAX analysis of Hg <sup>2+</sup> treated Se-PR 1 and Se-PR 2                                 | S15-16         |
| 9.           | Comparative Study of powder XRD analysis of Se-PR 2 and recycled Se-PR 2                                            | S17            |
| 10.          | Comparative Study of FE-SEM Images of Se-PR 2 and Recycled Se-PR 2                                                  | S18            |
| 11.          | Comparative Study of nitrogen sorption and desorption analysis of pristine Se-PR 2 and recycled Se-PR 2             | S19            |
| 12.          | Comparative Study of EDAX analysis of Hg <sup>2+</sup> loaded Se-PR 2 and recycled Se-PR 2                          | S20            |
| 13.          | References                                                                                                          | S21            |

## 1. Synthesis of Rh-B-imine

Rhodamine-B hydrazide (**1**) and Rhodamine-B imine (Rh-B-imine) were synthesized based on literature reports.<sup>1-3</sup> **Figure S1** describes the synthesis of Rh-B imine. In a double-necked round-bottomed flask, 0.208 g (0.45mmol) of rhodamine-B hydrazide and 0.043 mL (0.45 mmol) of 2-pyridine carboxaldehyde were placed. Methanol and a few drops of acetic acid were added to the mixture and the content was refluxed for 2 hours. The resulting white precipitate (0.173 g, 74.3%) was filtered through a Buckner funnel using vacuum filtration, and the solid was then washed with methanol and dried under vacuum. HRMS (ESI)<sup>+</sup>  $m/z$  [M + H]<sup>+</sup> calcd for C<sub>34</sub>H<sub>35</sub>N<sub>5</sub>O<sub>2</sub>: 546.2864; found 546.2870. <sup>1</sup>H NMR (400 MHz, CDCl<sub>3</sub>)  $\delta$  8.50 – 8.43 (m, 1H), 8.38 (s, 1H), 8.05 – 7.97 (m, 2H), 7.60 (td,  $J$  = 7.7, 1.7 Hz, 1H), 7.53 – 7.40 (m, 2H), 7.17 – 7.08 (m, 2H), 6.55 (d,  $J$  = 8.8 Hz, 2H), 6.45 (d,  $J$  = 2.6 Hz, 2H), 6.24 (dd,  $J$  = 8.8, 2.6 Hz, 2H), 3.31 (q,  $J$  = 7.1 Hz, 8H), 1.15 (t,  $J$  = 7.0 Hz, 12H). FTIR (KBr): 3444, 2974, 2877, 1729, 1617, 1520, 1364, 1304, 1222, 1118, 969, 782, 521 cm<sup>-1</sup>.

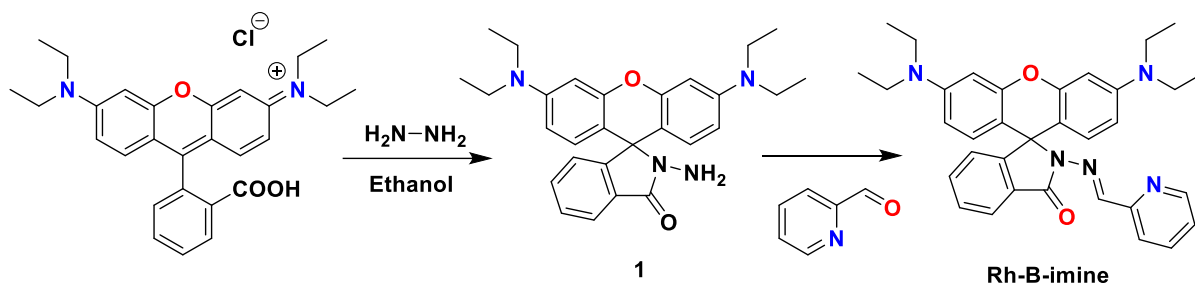

**Figure S1.** Synthesis of Rhodamine – B imine (Rh-B-imine) probe.

## 2. Mechanism for selenation and polymerization

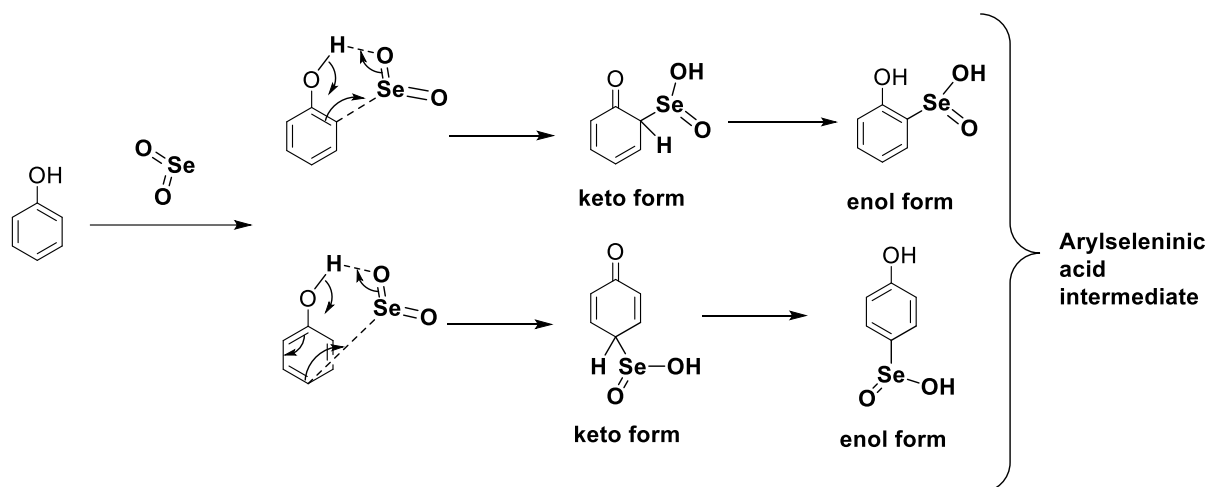

**Figure S2:** Reaction mechanism for the formation of arylseleninic acid intermediate.

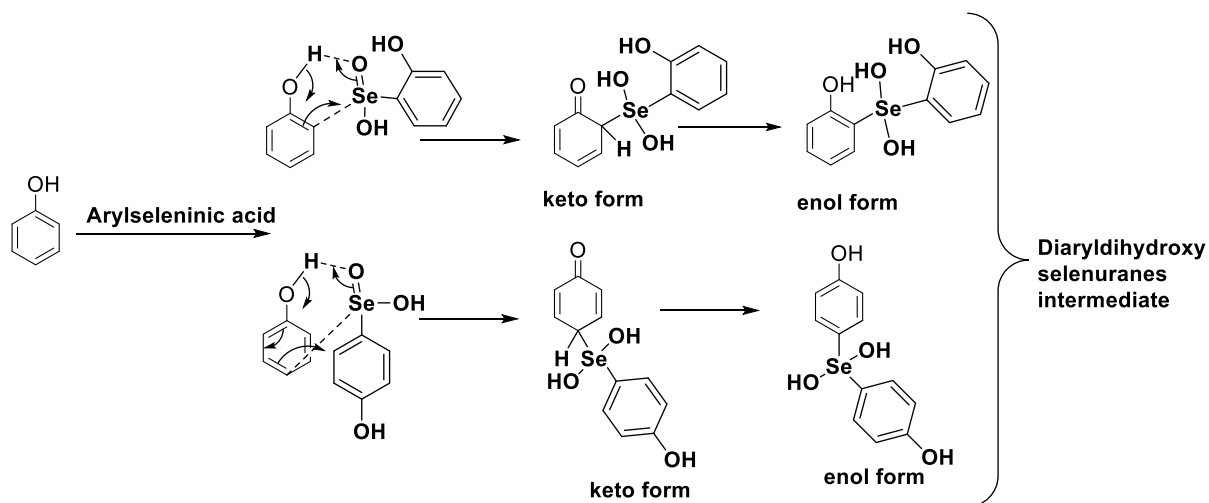

**Figure S3:** Reaction mechanism for the formation of diaryl dihydroxyselenuranes intermediate.

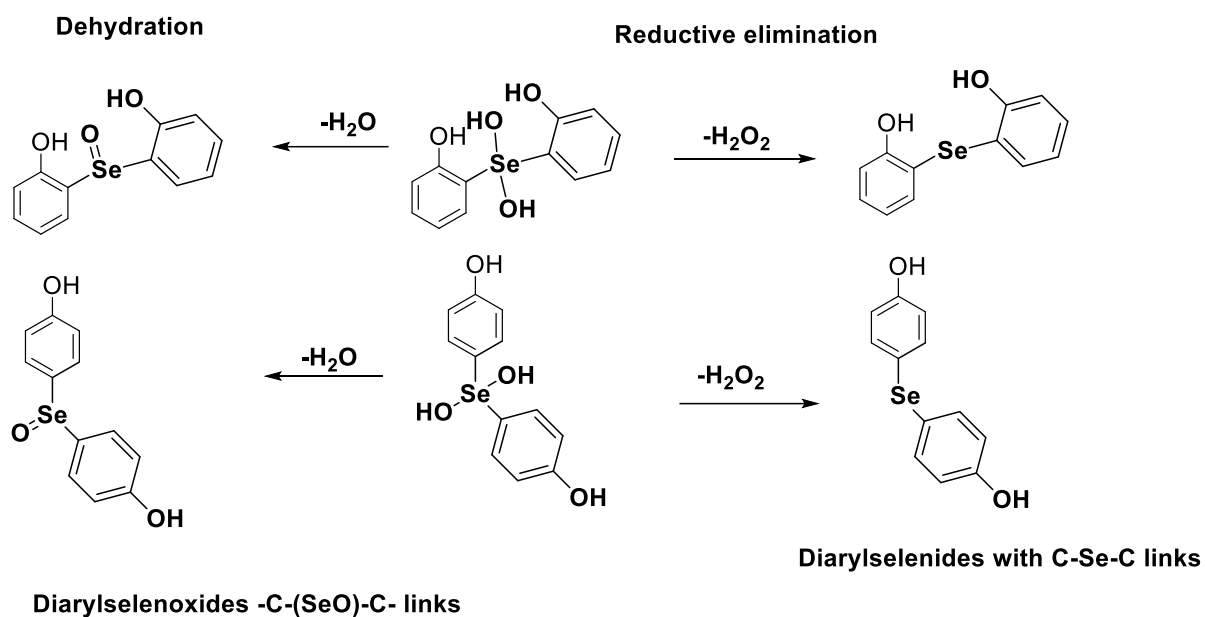

**Figure S4:** Reaction mechanism for the formation of diarylselenide monomers.

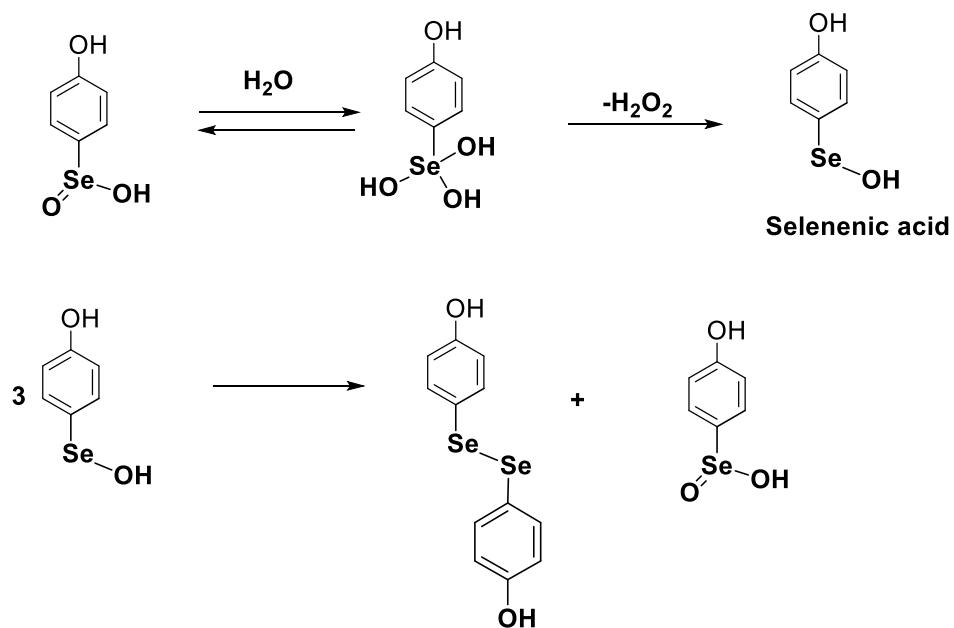

**Figure S5:** Reaction mechanism for the formation of diaryl-diselenide monomer.

(a) Step growth polymerization

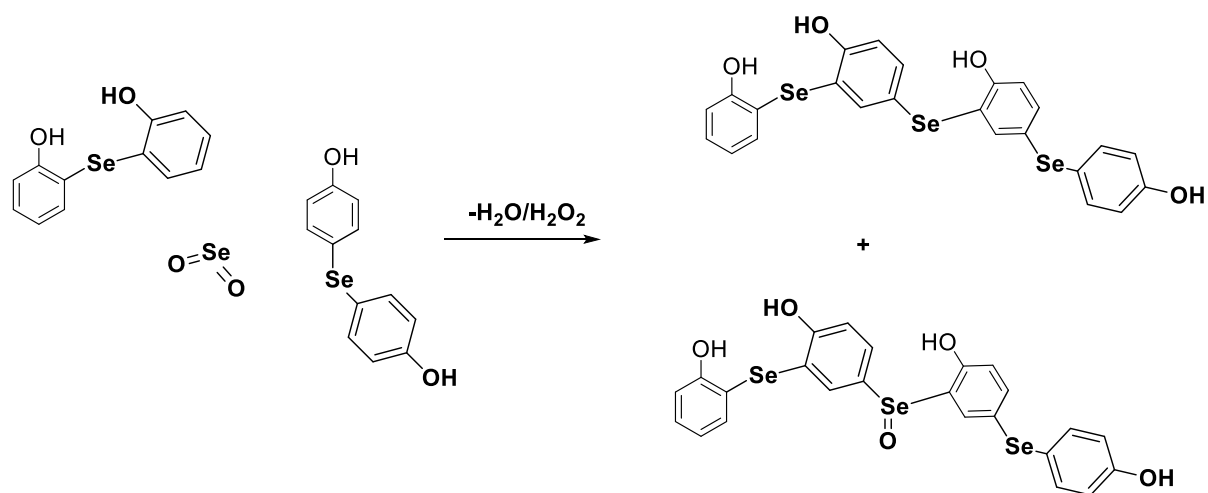

(b) Solvent assistance

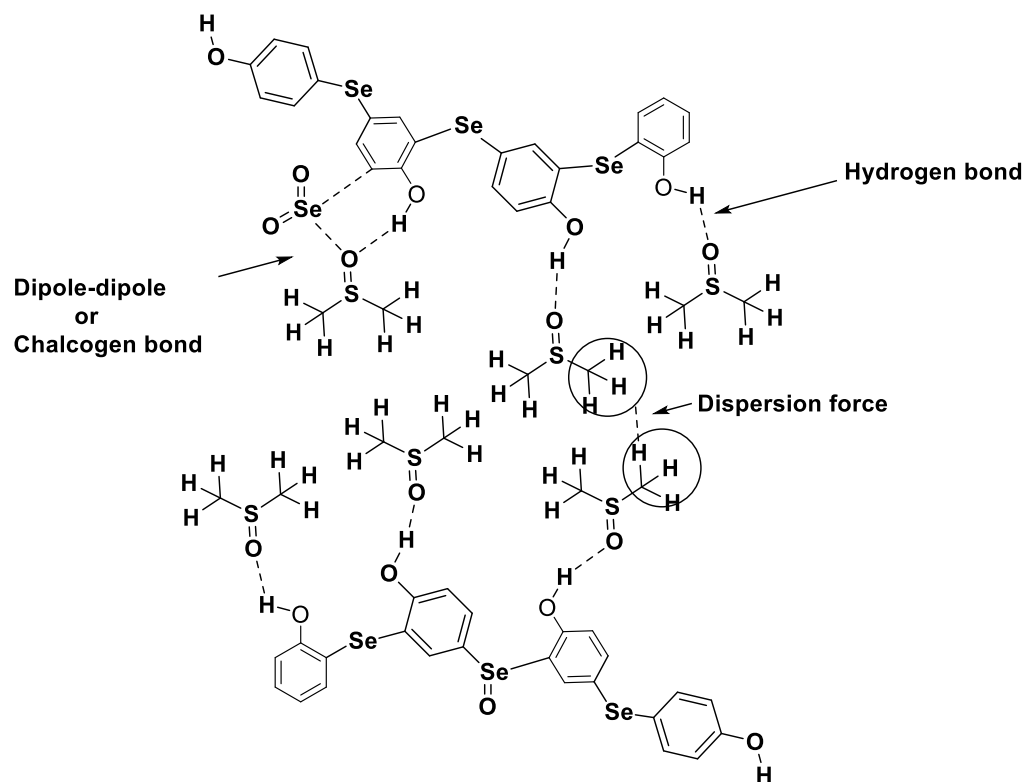

**Figure S6:** Mechanism for the (a) step growth polymerization (b) solvent assistance for polymerization

### 3. Spectrometric characterization of Rh-B-imine

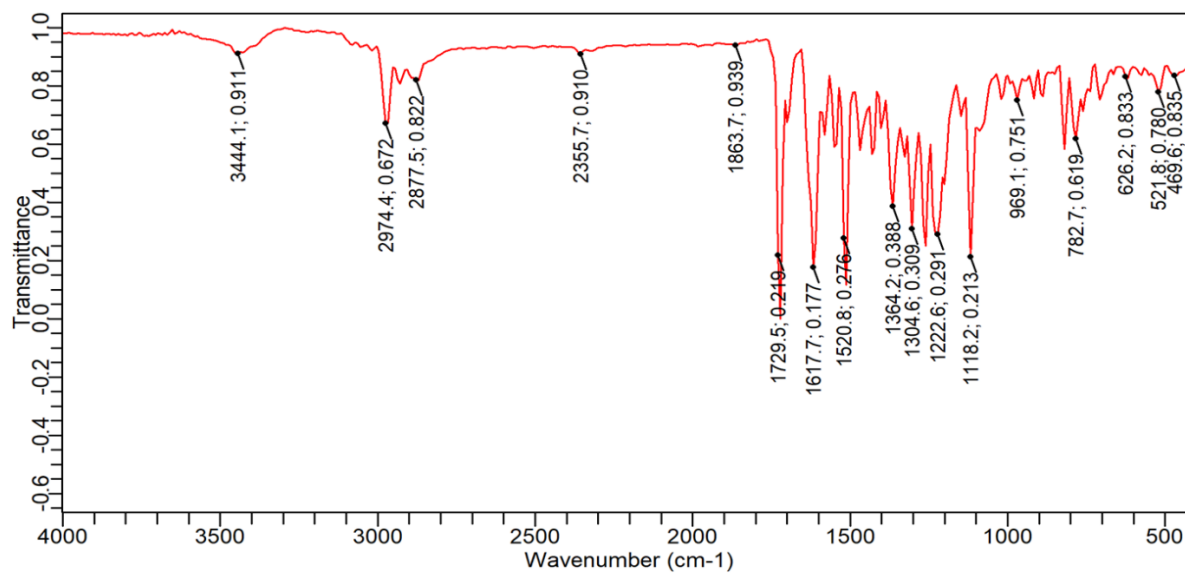

**Figure S7.** FTIR – spectrum for Rh-B-imine

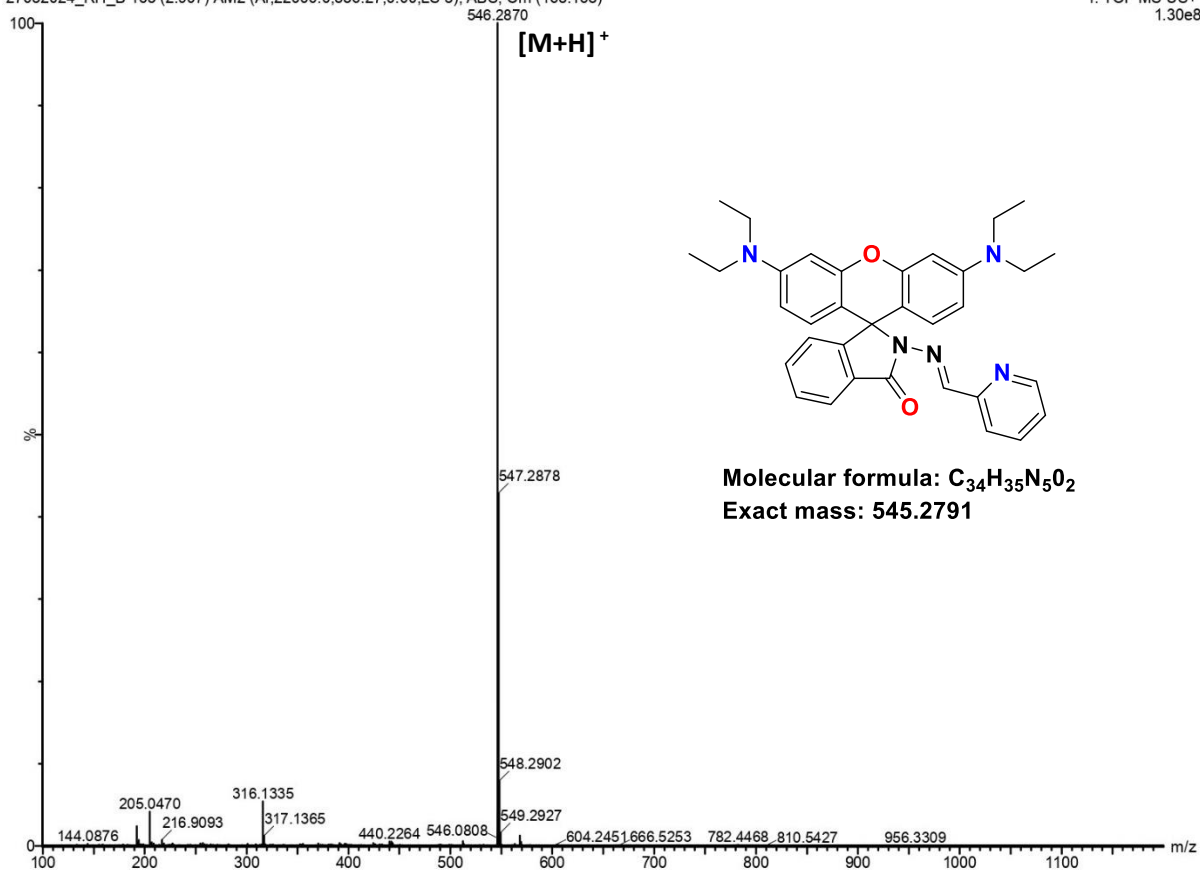

**Figure S8.** HRMS (ESI)<sup>+</sup> – spectrum for Rh-B-imine

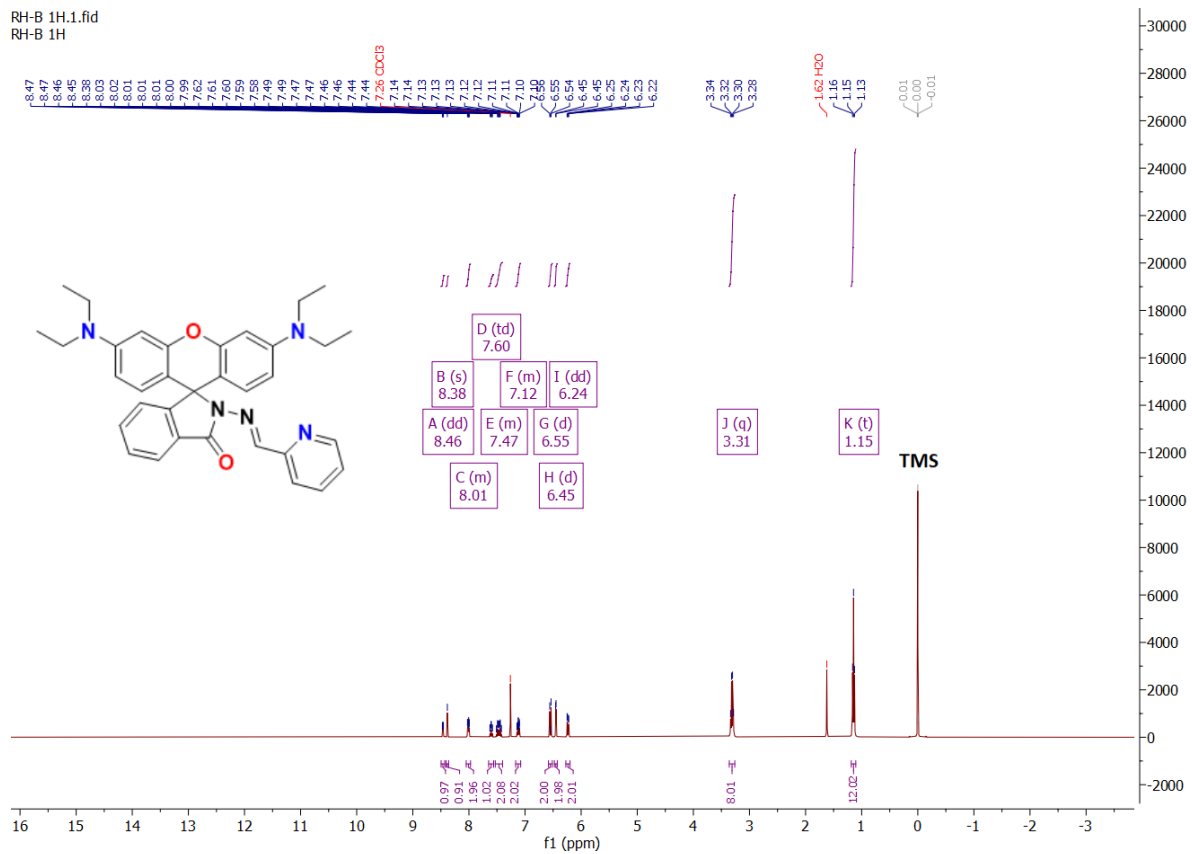

**Figure S9.**  $^1\text{H}$  – NMR spectral studies for Rh-B-imine



#### 4. Elemental mapping and EDAX analysis of Se-PR 1 and Se-PR 2

(a)

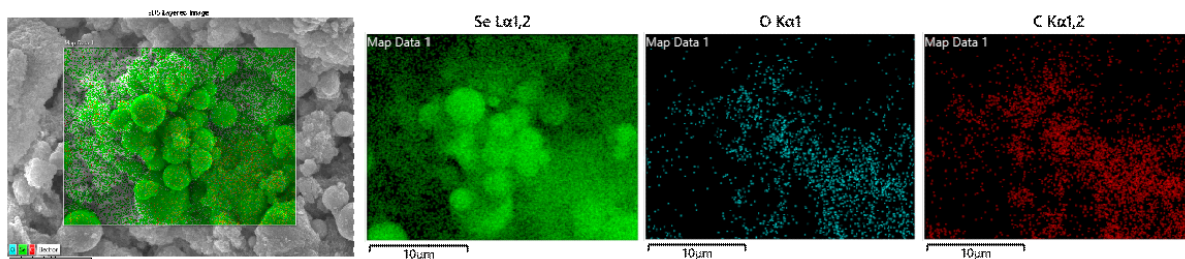

(b)

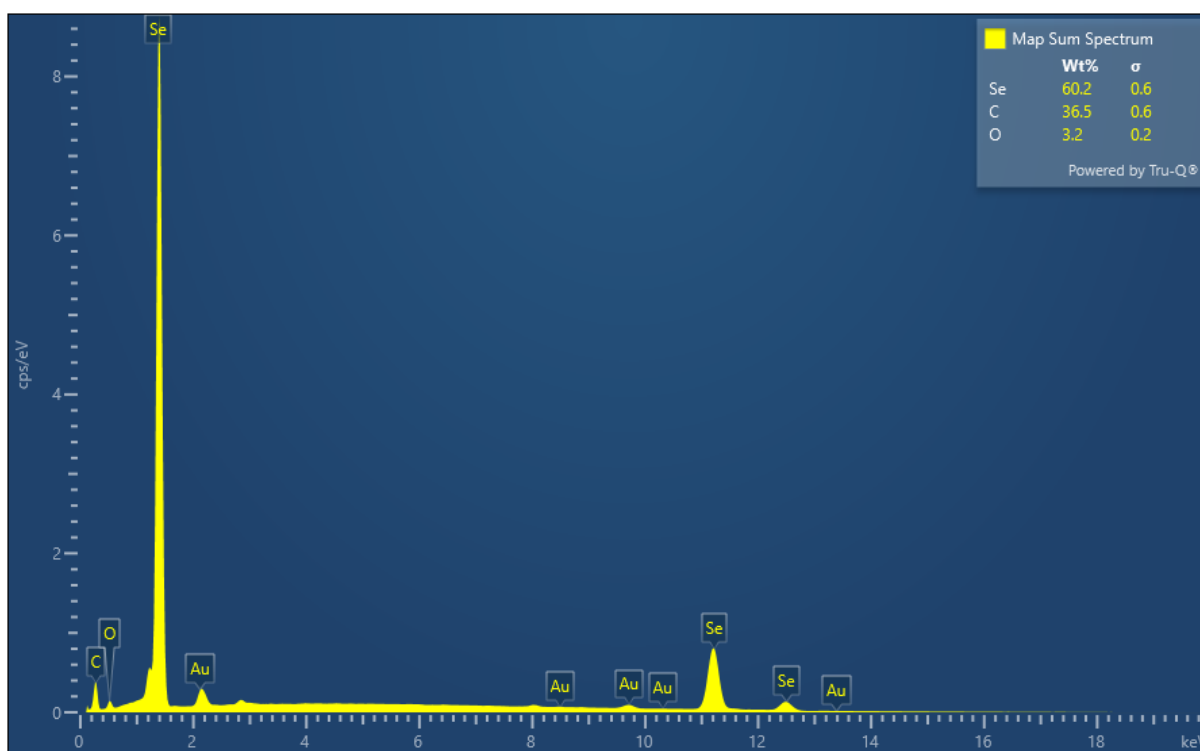

**Figure S10.** (a) Elemental mapping and (b) EDAX – Spectral Analysis of pristine Se-PR 1

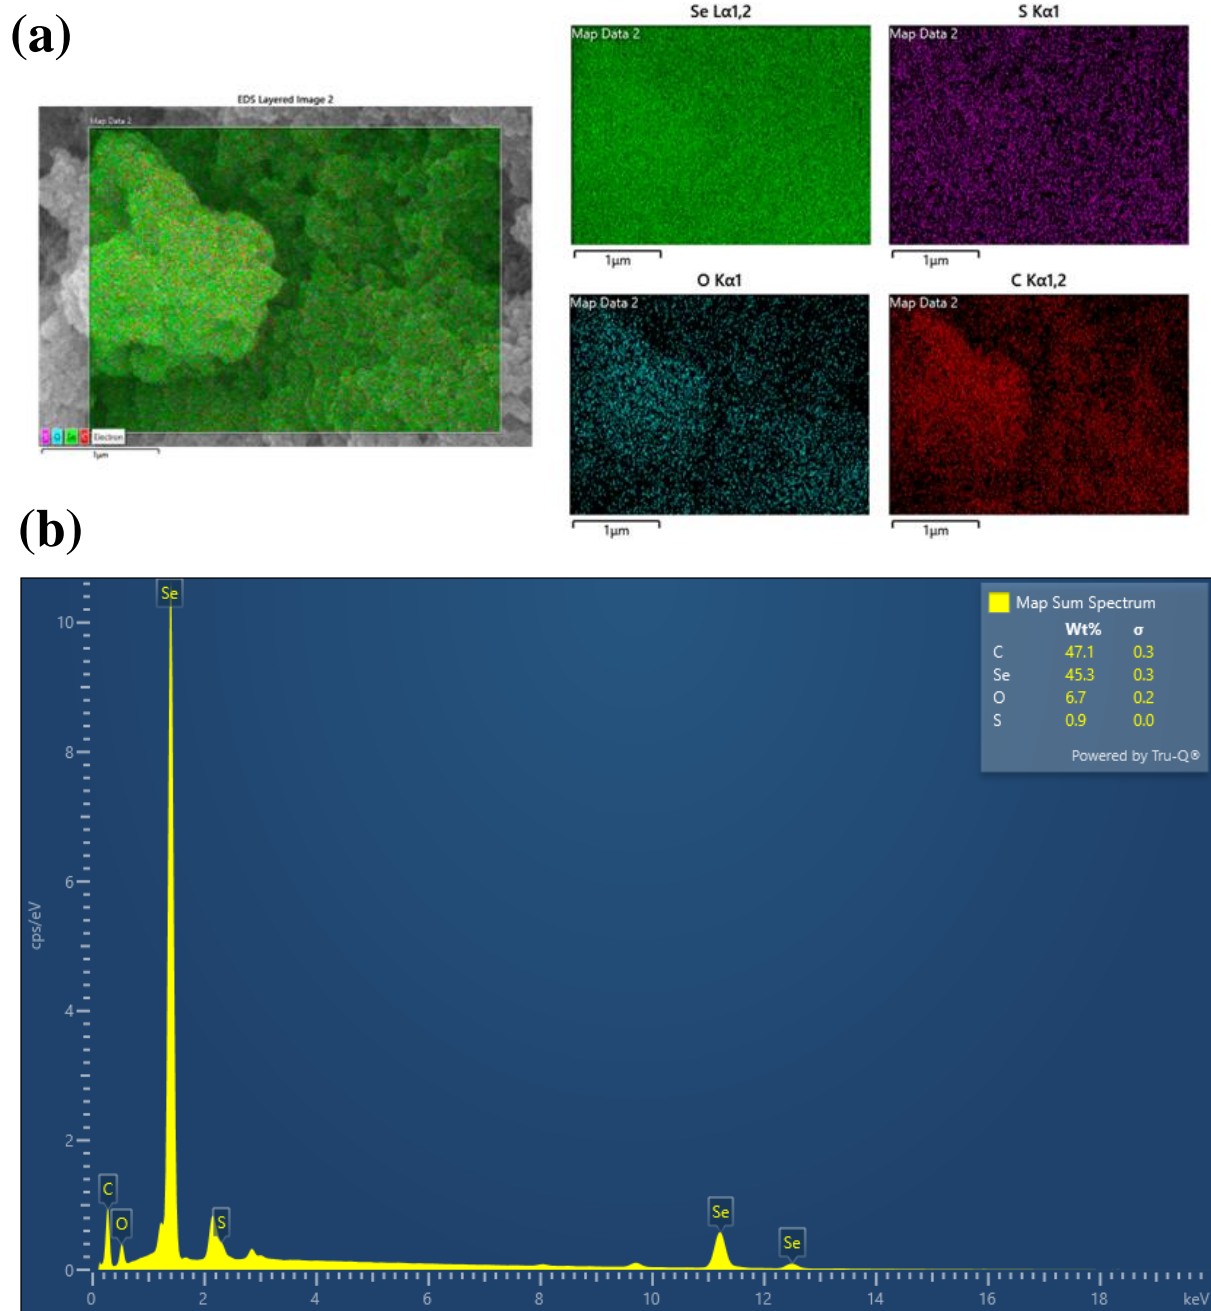

**Figure S11.** (a) Elemental mapping and (b) EDAX – Spectral Analysis of pristine Se-PR 2

**5. Freundlich adsorption isotherm (linear fit model) for the  $\text{Hg}^{2+}$  adsorption on Se-PR 1 and Se-PR 2**

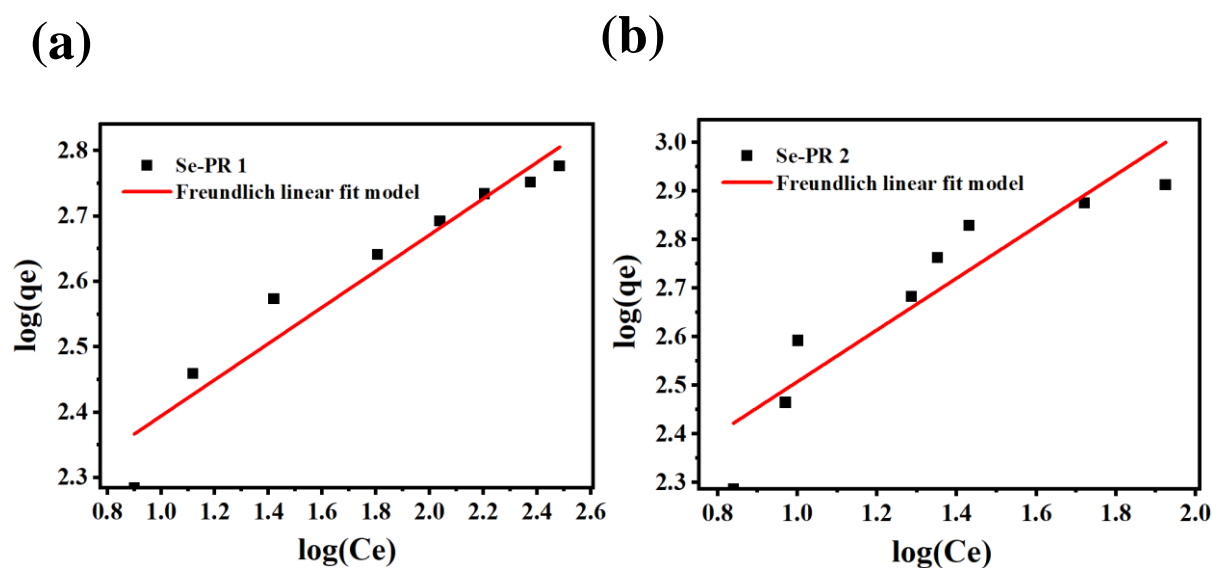

**Figure S12:** Freundlich linear fit model for the (a)  $\text{Hg}^{2+}$  adsorption on Se-PR 1 and (b)  $\text{Hg}^{2+}$  adsorption on Se-PR 2.

**Table S1:** Freundlich adsorption isotherm model parameters for the adsorption of  $\text{Hg}^{2+}$  ions on Se-PR 1 and Se-PR 2.

|         | Intercept | Slope  | $n$  | $k_f$<br>(mg/g) ((L/mg) <sup>1/n</sup> ) | $R^2$  |
|---------|-----------|--------|------|------------------------------------------|--------|
| Se-PR 1 | 2.11716   | 0.2772 | 3.61 | $1.31 \times 10^2$                       | 0.9199 |
| Se-PR 2 | 1.97499   | 0.5327 | 1.88 | $9.4 \times 10^1$                        | 0.8318 |

6. Comparison FT-IR spectrum pristine and  $\text{Hg}^{2+}$  containing Se-PR 1

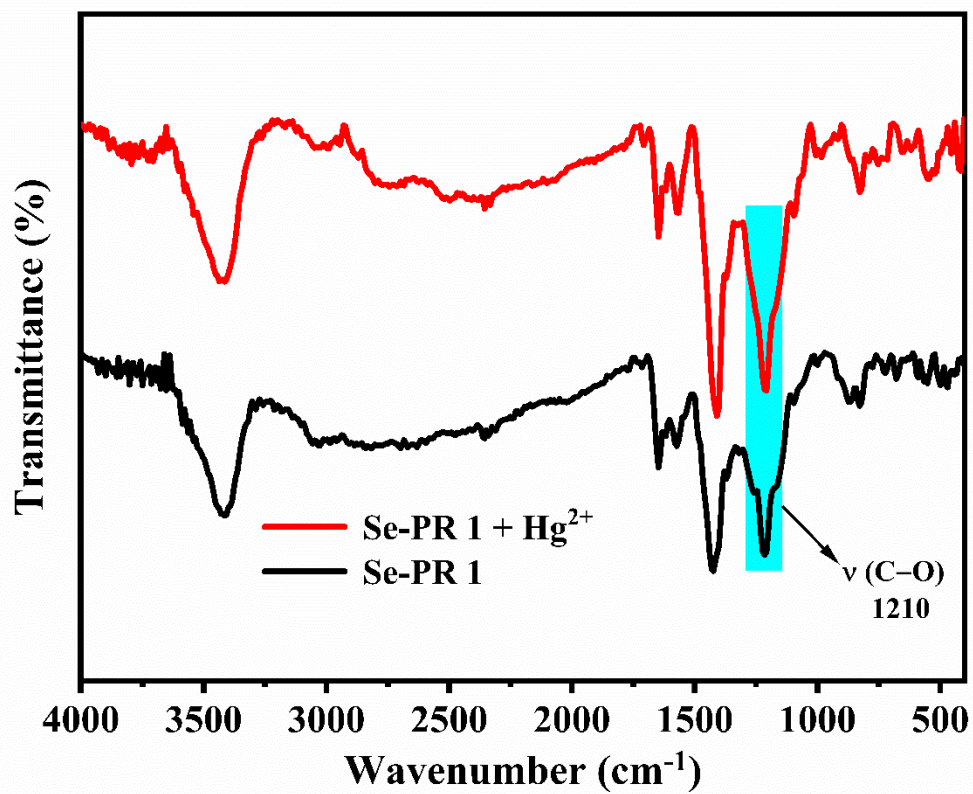

**Figure S13:** Overlay of FT-IR spectrum of pristine and  $\text{Hg}^{2+}$  treated Se-PR 1

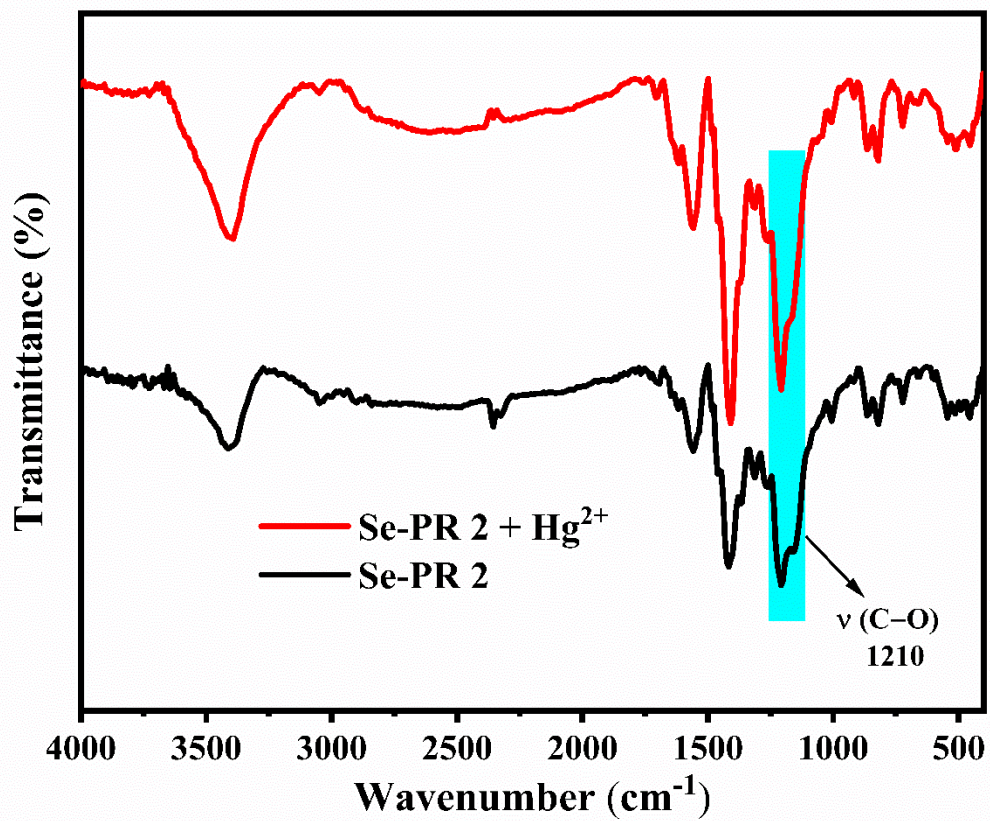

**Figure S14:** Overlay of FT-IR spectrum of pristine and Hg<sup>2+</sup> treated Se-PR 2



**7. Comparison of FE-SEM images of pristine Se-PR 1 and Se-PR 2 with their respective Hg<sup>2+</sup> treated material**

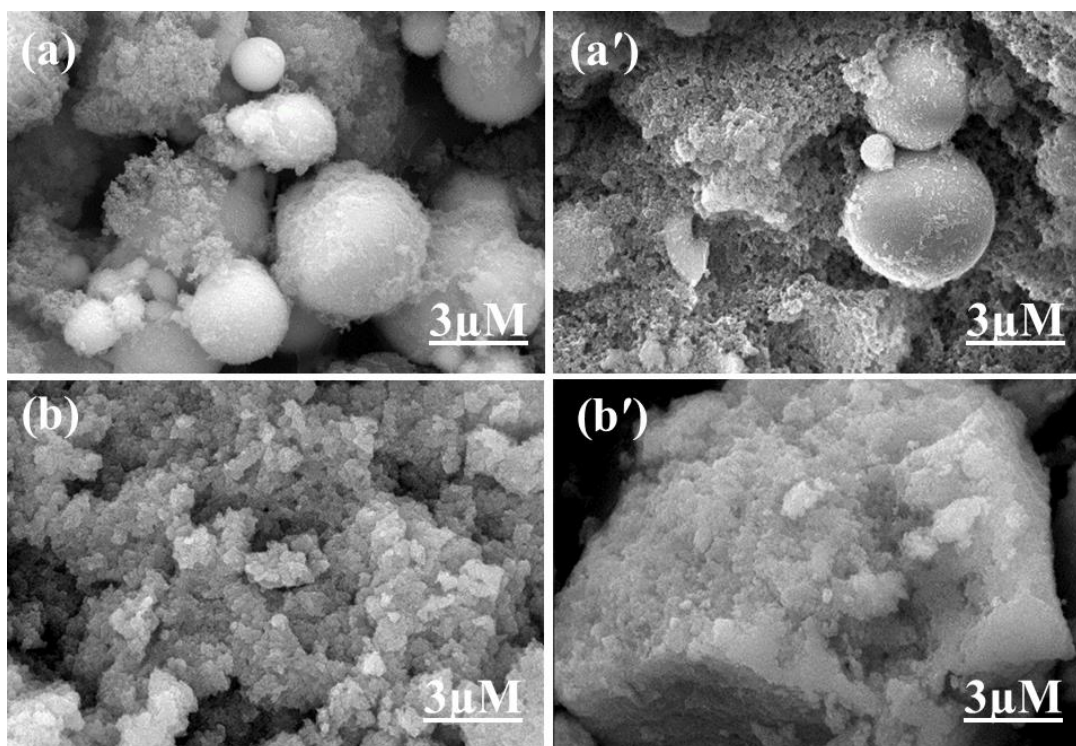

**Figure S15:** (a) Pristine Se-PR 1 and (a') Hg<sup>2+</sup> treated Se-PR 1; (b) Pristine Se-PR 2 and (b') Hg<sup>2+</sup> treated Se-PR 2

## 8. Elemental mapping and EDAX analysis of Hg<sup>2+</sup> treated Se-PR 1 and Se-PR 2

(a)

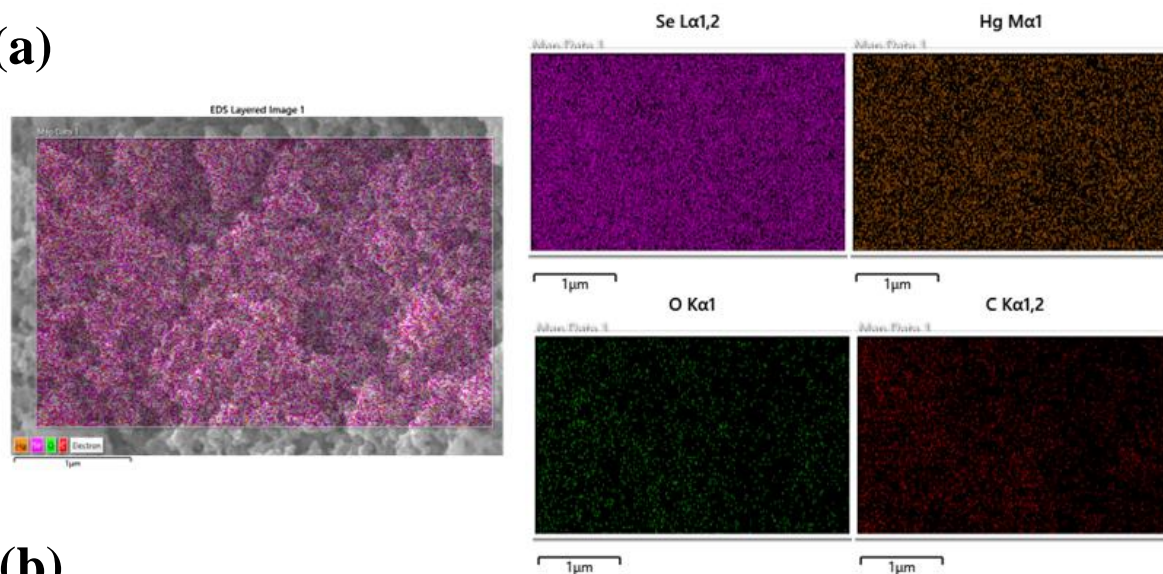

(b)

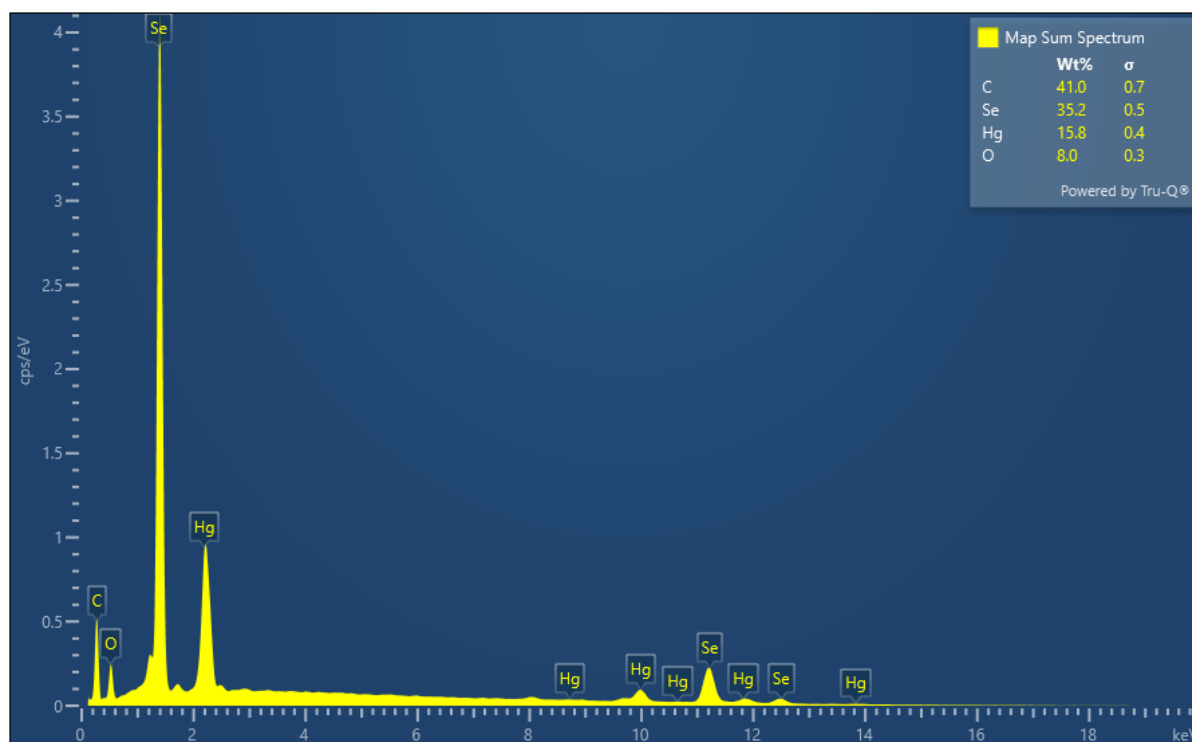

**Figure S16:** (a) Elemental mapping and (b) EDAX – Spectral Analysis of Se-PR 1 with adsorbed Hg<sup>2+</sup> ions

(a)

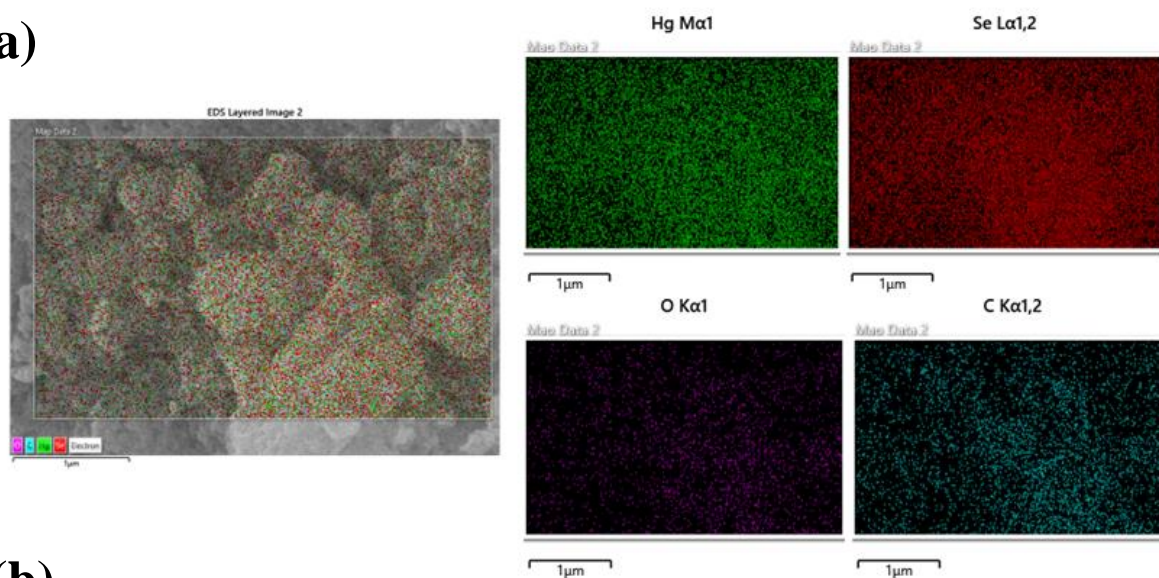

(b)

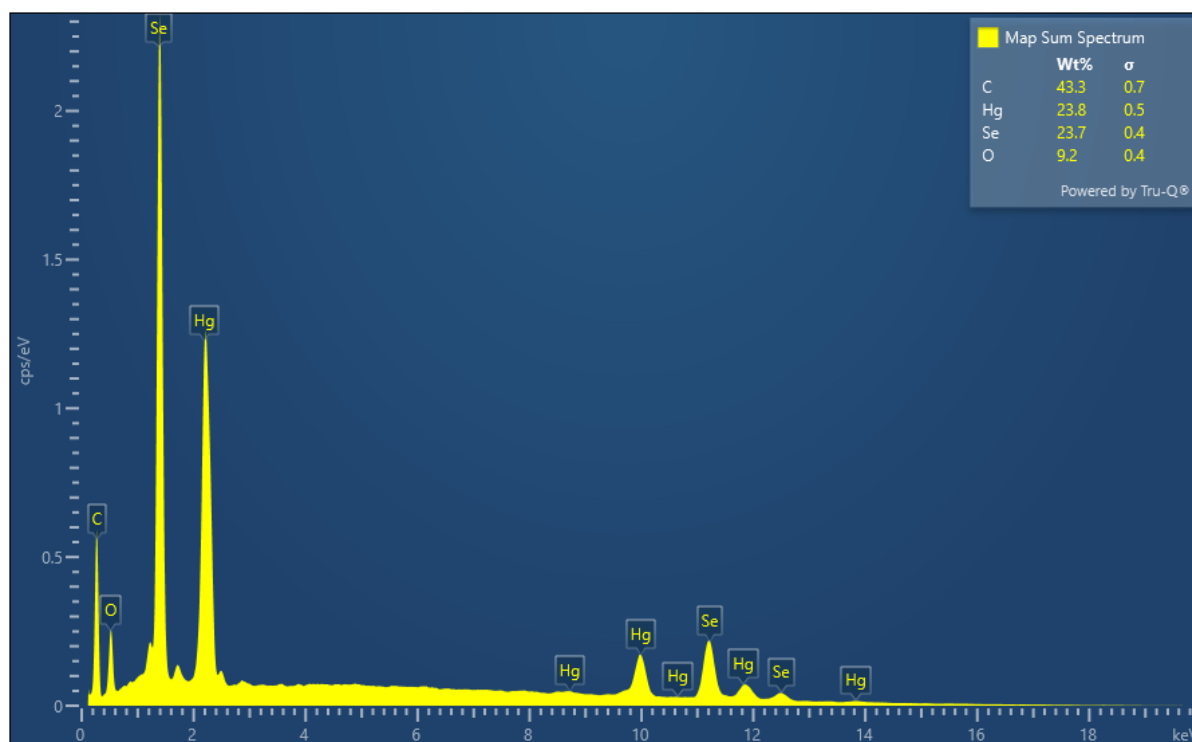

**Figure S17:** (a) Elemental mapping and (b) EDAX – Spectral Analysis of Se-PR **2** with adsorbed Hg<sup>2+</sup> ions



9. Comparative Study of powder XRD analysis of Se-PR 2 and recycled Se-PR 2

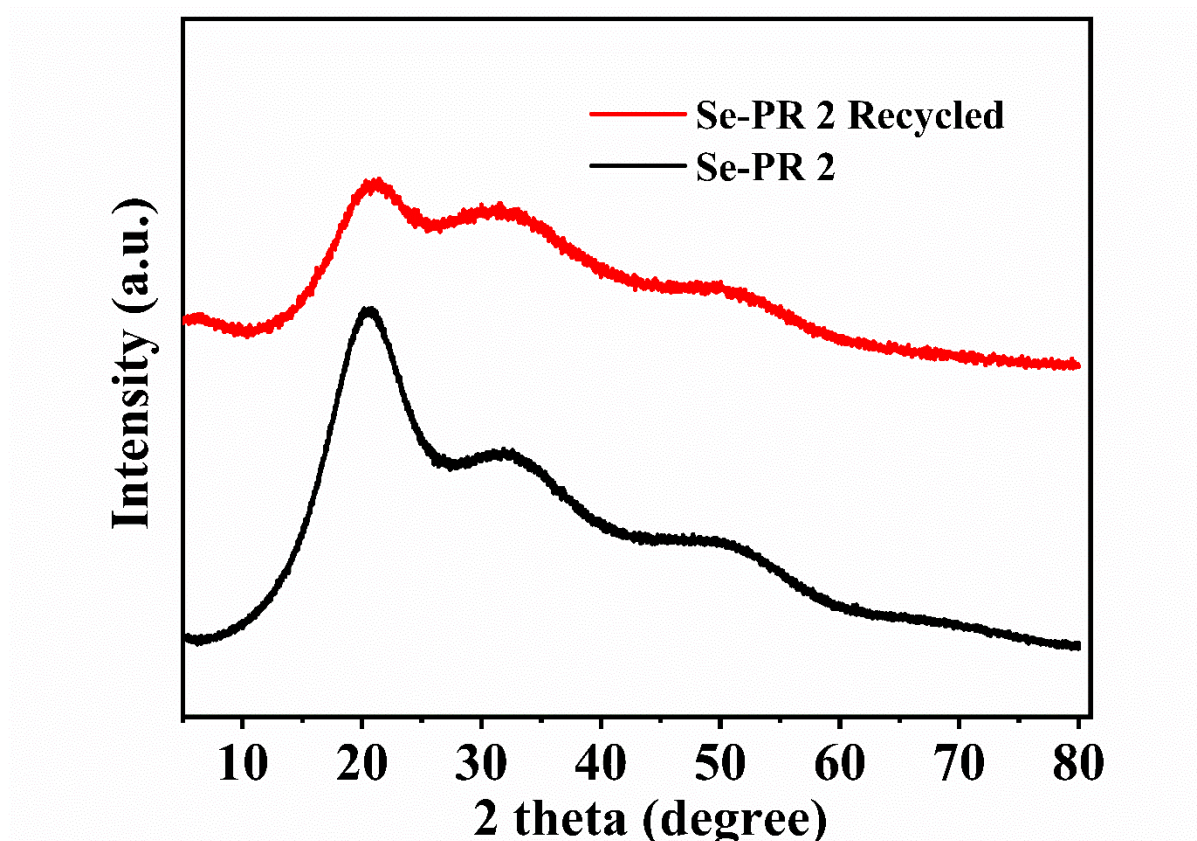

Figure S18: Powder XRD of (a) Pristine polymer of Se-PR 2 and (b) Recycled Se-PR 2.

## 10. Comparative Study of FE-SEM Images of Se-PR 2 and recycled Se-PR 2

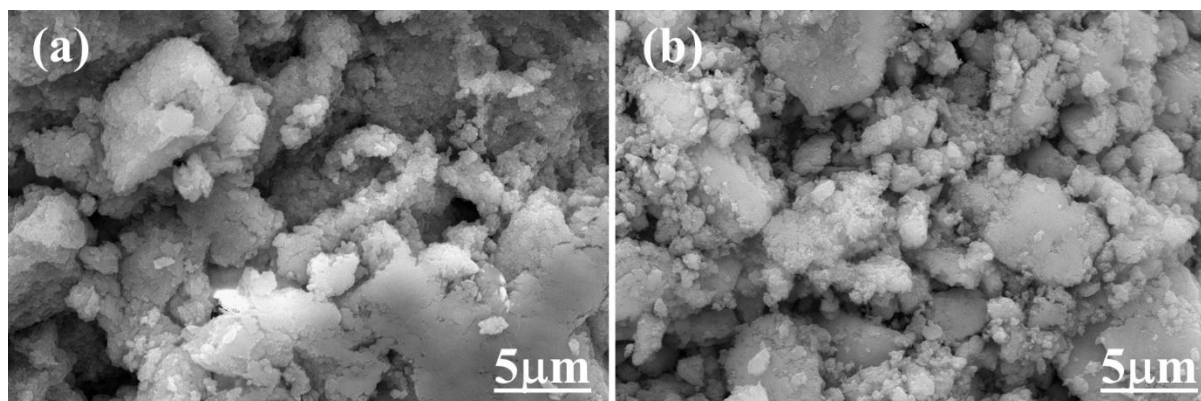

**Figure S19:** FE-SEM images of (a) Pristine polymer of Se-PR 2 and (b) Recycled Se-PR 2.

## 11. Comparative Study of nitrogen sorption and desorption analysis of Pristine Se-PR 2 and recycled Se-PR 2

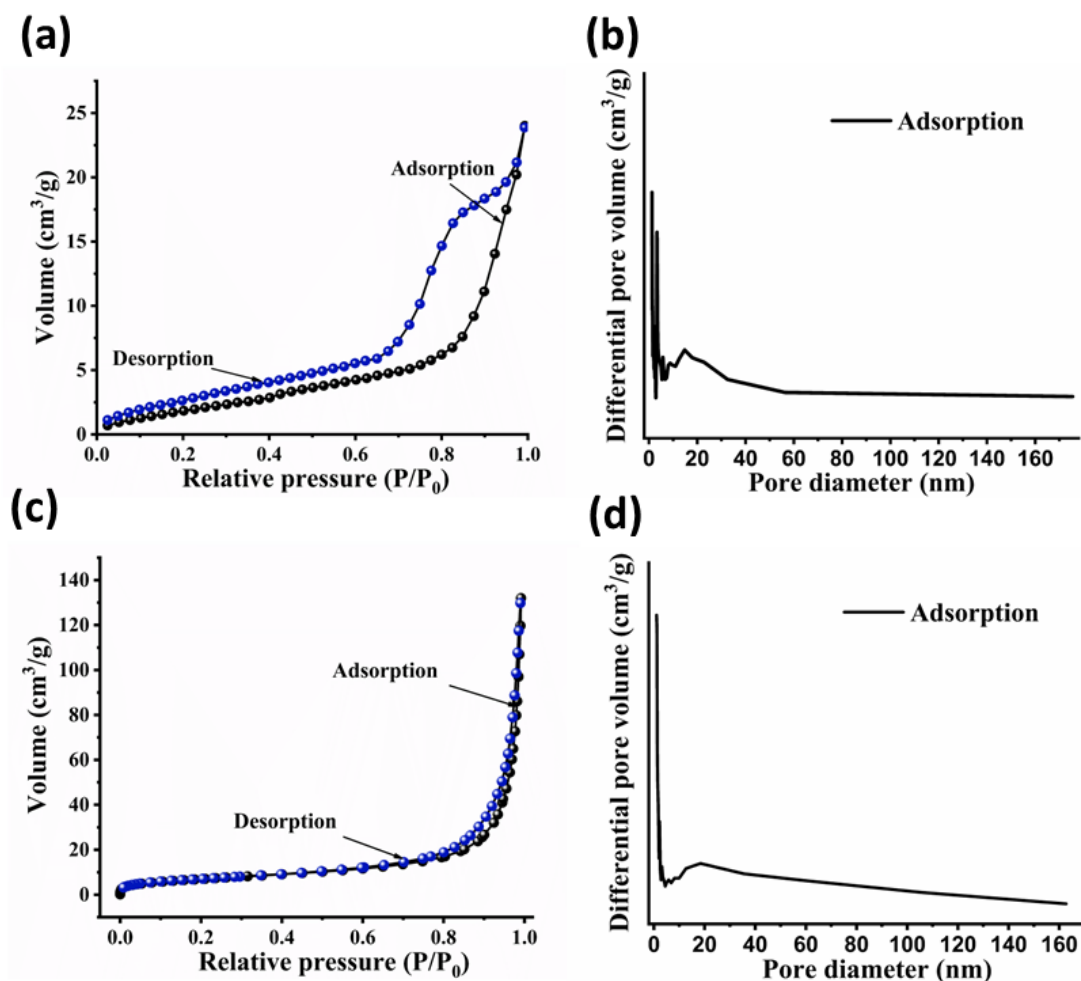

**Figure S20:** (a) and (b) N<sub>2</sub> sorption isotherm and BJH pore size distribution curve of pristine Se-PR 2, (c) and (d) N<sub>2</sub> sorption isotherm and BJH pore size distribution curve of recycled Se-PR 2.

**Table S2:** Surface area, pore volume and average pore size

| Polymer          | BET surface area<br>(m <sup>2</sup> g <sup>-1</sup> ) | Total Pore volume<br>(cc g <sup>-1</sup> ) | Average Pore size<br>(nm) |
|------------------|-------------------------------------------------------|--------------------------------------------|---------------------------|
| Pristine Se-PR 2 | 16.568                                                | 0.041                                      | 1.226                     |
| Recycled Se-PR 2 | 38.862                                                | 0.184                                      | 1.045                     |

## 12. Comparative Study of EDAX analysis of Hg<sup>2+</sup> loaded Se-PR 2 and recycled Se-PR 2

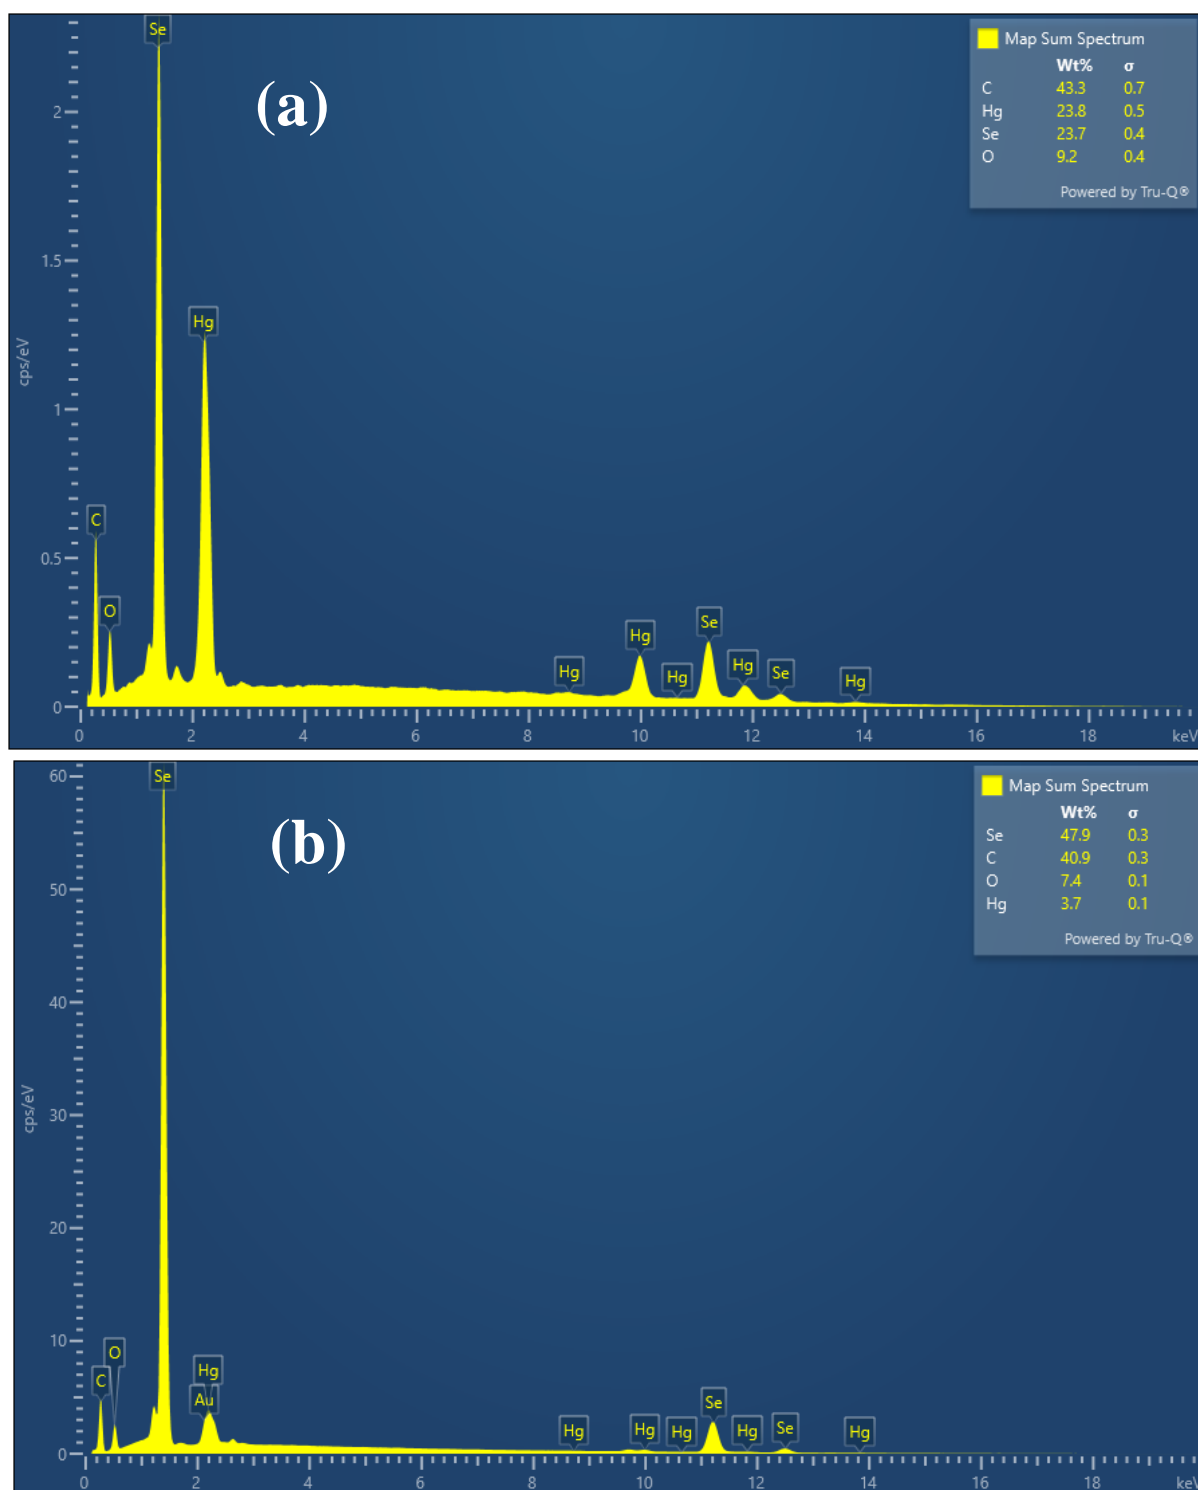

**Figure S21:** EDAX – Spectral Analysis of (a) Hg<sup>2+</sup> loaded Se-PR 2 (b) recycled Se-PR 2

### 13. References:

1. P. Mahato, S. Saha, P. Das, H. Agarwalla and A. Das, *RSC adv.* 2014, **4**, 36140-36174.
2. K. N. Kim, M. G. Choi, J. H. Noh, S. D. Ahn and S. K. Chang, *Bull Korean Chem Soc.*, 2008, **29**, 571-574.
3. A. Leite, A. M. Silva, L. Cunha-Silva, B. de Castro, P. Gameiro and M. Rangel, *Dalton Trans.*, 2013, **42**, 6110-6118.
